# Supplementary material for: Indirect Effect of 7-Valent Pneumococcal Conjugate Vaccine on Pneumococcal Carriage in Newborns in Rural Gambia: A Randomised Controlled Trial
Source: PLOS journal article supplement (doi:10.1371/journal.pone.0049143), 2012-11-21
Supplement: S2 (10.1371/journal.pone.0049143.s002) [file journal.pone.0049143.s002]

27<sup>th</sup> February 2006

Prof. Richard Adegbola  
Head  
Bacterial Diseases Programme  
MRC, Fajara

Dear Prof. Adegbola

**Re: 1032v2 Community randomised controlled trial to assess the impact of vaccination with a pneumococcal conjugate vaccine on nasopharyngeal carriage of pneumococci in the Gambia.**

Thank you for resubmitting the above proposal which was reviewed and approved by the Joint Gambia Government/MRC Ethics Committee at its meeting on Friday 24<sup>th</sup> February 2006.

With best wishes,

Yours sincerely



Mr. Malcolm Clarke  
Chairman  
Gambia Government/MRC Joint Ethics Committee

Cc:

**The Gambia Government / MRC Laboratories Joint Ethics Committee:**

*Mr Malcolm Clarke, Chairman  
Mrs Kathy Hill, Secretary  
Mrs Norwoh Ali, 2<sup>nd</sup> Secretary  
Dr Ousman Nyan, Scientific Advisor  
Mr Dawda Jagne  
Mrs Bertha Mboge*

*Dr Tunani Corrah  
Professor Hilton Whittle  
Dr Stephen Howie  
Dr Mariatou Jallow  
Dr. Lamin Sidibeh  
Mr. Malamin Sonko*
